# Supplementary material for: Uncertainties in eddy covariance air–sea CO 2 flux measurements and implications for gas transfer velocity parameterisations
Source: Copernicus journal article supplement (doi:10.5194/acp-21-8089-2021), 2021-05-26
Supplement: Supplementary file 2 [file acp-21-8089-2021-supplement.zip]

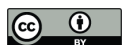

## *Supplement of*

# **Uncertainties in eddy covariance air–sea CO<sub>2</sub> flux measurements and implications for gas transfer velocity parameterisations**

**Yuanxu Dong et al.**

*Correspondence to:* Yuanxu Dong (yuanxu.dong@uea.ac.uk) and Mingxi Yang (miya@pml.ac.uk)

- [acp-21-8089-2021-supplement-title-page.pdf](#)
- [AMT28\\_uncertainty.txt](#)
- [AMT29\\_uncertainty.txt](#)
- [JR18006\\_uncertainty.txt](#)
- [JR18007\\_uncertainty.txt](#)
- [Uncertainty paper\\_Supplement.pdf](#)

The copyright of individual parts of the supplement might differ from the article licence.
